# Supplementary material
Source: publisher figshare collection journal article supplement (https://gsapubs.figshare.com/articles/dataset/_/12540281)
Supplement: Supplementary file 1 [file 1]

**Data Repository 1****Lateral magma propagation during the emplacement of La Gloria Pluton, central Chile**

F. Gutiérrez, I. Payacán, D. Szymanowski, M. Guillong, O. Bachmann, and M.A. Parada

**LA-ICP-MS U–PB METHODOLOGY**

For U–Pb analyses, zircon crystals were separated from rock samples using routine crushing, grinding, Gemini Table, heavy liquid and Frantz magnetic separation at the Geology Department, University of Chile. About 60 zircons per sample were mounted in epoxy resin, polished, characterized by cathodoluminescence imaging, and analyzed by laser ablation inductively coupled plasma mass spectrometry (LA-ICP-MS) at ETH Zürich. Detailed parameters of the analytical setup and procedures for LA-ICP-MS U–Th–Pb geochronology as well as results for samples and secondary reference materials are reported in tables DR1–3 following community-derived guidelines of Horstwood et al. (2016).

We calculated weighted mean sample ages from individual LA-ICP-MS U–Pb dates (Fig. 2A of the main text and table S1 below) but used them in a qualitative way to illustrate the age progression along La Gloria Pluton. Weighted mean ages of individual hand samples are not geologically meaningful for plutonic samples that display protracted crystallization histories of up to 200 k.y. (shown here with ID-TIMS dating) and as much as 700 k.y. in other plutons (Schoene et al., 2012; Samperton et al., 2015). In that context, the apparent age dispersion (elevated MSWD of LA-ICP-MS results) in individual samples partly reflects the real zircon age spread, and partly analytical sources of error in these measurements.

Even given these complexities, the calculated weighted means of LGP LA-ICP-MS dates are systematically offset by 1–2% from the benchmark ID-TIMS dates (Fig. 2). A likely explanation lies in the fact that the LA-ICP-MS analyses were performed on unannealed zircons without applying an alpha-dose correction for young zircons (Sliwinski et al., 2017). This key correction was developed after the LGP analyses were performed and could not be retroactively applied, as a more complete selection of secondary reference materials would be required. However, the slight inaccuracy of our LA-ICP-MS data has no bearing on the first-order conclusions of our study, where the within-pluton age progression is convincingly shown with ID-TIMS dates.

Table DR1

| Sample<br>Number | Coordinates |         |       | LA-ICP-MS |      |          |                    |
|------------------|-------------|---------|-------|-----------|------|----------|--------------------|
|                  | N [m]       | E [m]   | H [m] | # Points  | MSWD | Age [Ma] | $\pm 2\sigma$ [Ma] |
| LG19             | 6,300,210   | 390,173 | 3,292 | 31        | 2.5  | 10.27    | 0.11               |
| LG17             | 6,298,794   | 392,301 | 2,486 | 44        | 3.1  | 9.92     | 0.11               |
| LG42             | 6,295,101   | 391,216 | 2,006 | 57        | 1.9  | 10.31    | 0.11               |
| LG37             | 6,293,345   | 391,737 | 1,527 | 77        | 2.6  | 10.42    | 0.11               |
| LG29             | 6,292,516   | 393,543 | 1,480 | 39        | 2.7  | 10.12    | 0.12               |
| LG16             | 6,292,150   | 395,962 | 1,960 | 59        | 4    | 10.31    | 0.12               |
| LG12             | 6,288,818   | 397,664 | 2,717 | 54        | 2.7  | 10.34    | 0.11               |
| LG07             | 6,285,249   | 397,083 | 3,557 | 52        | 1.3  | 10.49    | 0.11               |
| LG03             | 6,283,070   | 397,263 | 3,049 | 109       | 1.3  | 10.54    | 0.11               |
| LG01             | 6,280,403   | 397,216 | 3,057 | 40        | 6.2  | 11.04    | 0.13               |

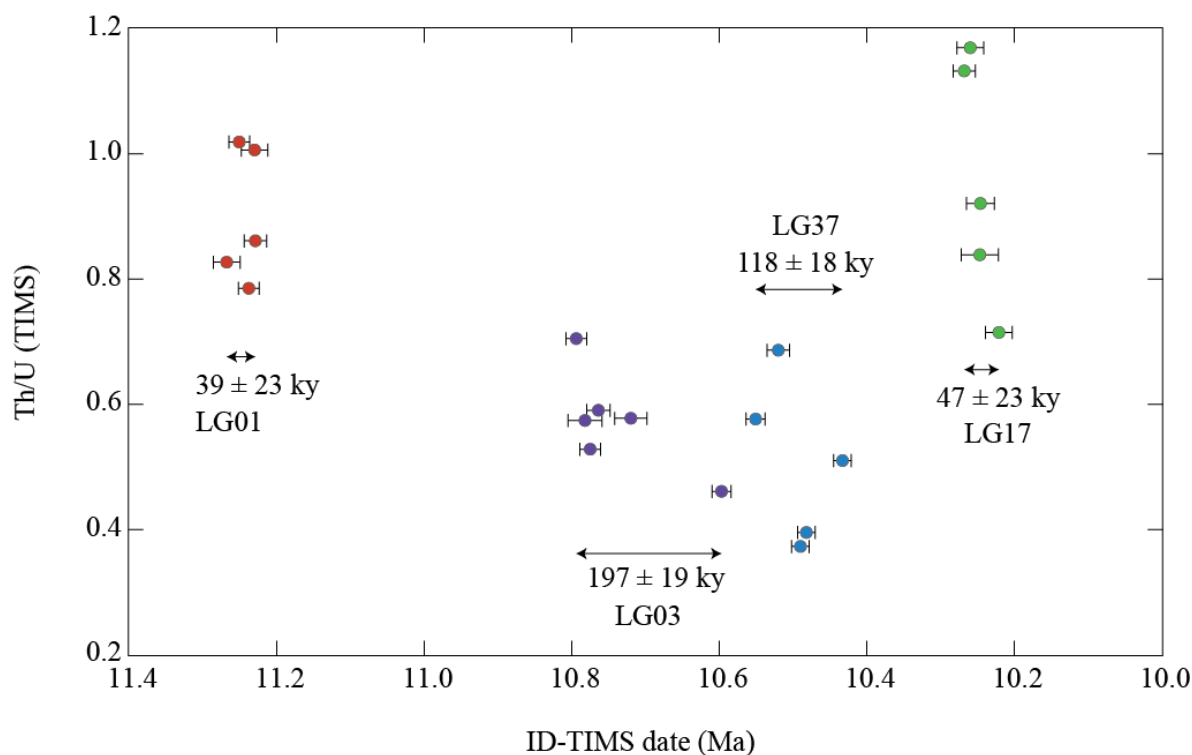

**Fig. DR1.** Whole-grain Th/U of dated zircons from ID-TIMS analyses. Zircon crystals from the pluton center (LG03, LG37) have systematically lower Th/U ratios as well as longer apparent crystallization intervals.

## REFERENCES CITED

- Horstwood, M. S., Košler, J., Gehrels, G., Jackson, S. E., McLean, N. M., Paton, C., Pearson, N. J., Sircombe, K., Sylvester, P., and Vermeesch, P., 2016, Community-derived standards for LA-ICP-MS U-(Th-) Pb geochronology—Uncertainty propagation, age interpretation and data reporting: *Geostandards and Geoanalytical Research*, v. 40, no. 3, p. 311-332.
- Samperton, K. M., Schoene, B., Cottle, J. M., Keller, C. B., Crowley, J. L., and Schmitz, M. D., 2015, Magma emplacement, differentiation and cooling in the middle crust: Integrated zircon geochronological–geochemical constraints from the Bergell Intrusion, Central Alps: *Chemical Geology*, v. 417, p. 322-340.
- Schoene, B., Schaltegger, U., Brack, P., Latkoczy, C., Stracke, A., and Günther, D., 2012, Rates of magma differentiation and emplacement in a ballooning pluton recorded by U–Pb TIMS-TEA, Adamello batholith, Italy: *Earth and Planetary Science Letters*, v. 355-356, p. 162-173.
- Sliwinski, J. T., Guillong, M., Liebske, C., Dunkl, I., von Quadt, A., and Bachmann, O., 2017, Improved accuracy of LA-ICP-MS U–Pb ages of Cenozoic zircons by alpha dose correction: *Chemical Geology*, v. 472, p. 8-21.

Table DR2

LA-ICP-MS U-(Th-)Pb Metadata

| Laboratory and Sample Preparation              |                                                                                       |
|------------------------------------------------|---------------------------------------------------------------------------------------|
| Laboratory name                                | Dept of Earth Science, ETH Zurich                                                     |
| Sample type/mineral                            | Magmatic Zircons                                                                      |
| Sample preparation                             | Conventional mineral separation, 1 inch resin mount, 1 $\mu\text{m}$ polish to finish |
| Imaging                                        | CL, Quanta200S, 10 kV                                                                 |
| Laser ablation system                          |                                                                                       |
| Make, Model and type                           | ASI (Resonetics) Resolution S155                                                      |
| Ablation cell and volume                       | Laurin Technic, 2 volume cell, effective volume $ca. 1 \text{ cm}^3$                  |
| Laser wavelength (nm)                          | 193 nm                                                                                |
| Pulse width (ns)                               | 25 ns                                                                                 |
| Fluence ( $\text{J cm}^{-2}$ )                 | $\sim 2 \text{ J cm}^{-2}$                                                            |
| Repetition rate (Hz)                           | 5 Hz                                                                                  |
| Ablation duration (s)                          | 40 s                                                                                  |
| Ablation pit depth / ablation rate             | $\sim 16 \mu\text{m}$ pit depth, equivalent to 0.08 $\mu\text{m/pulse}$               |
| Spot diameter ( $\mu\text{m}$ ) nominal/actual | 30 $\mu\text{m}$ / 30 $\mu\text{m}$                                                   |
| Sampling mode / pattern                        | Static spot ablation                                                                  |
| Carrier gas                                    | 100% He in the cell, Ar make-up gas combined in cell above ablation in funnel.        |
| Cell carrier gas flow ( $\text{l min}^{-1}$ )  | 0.7 $\text{l min}^{-1}$                                                               |
| ICP-MS Instrument                              |                                                                                       |
| Make, Model and type                           | Thermo Element XR, Sector-field single collector ICP-MS                               |
| Sample introduction                            | direct                                                                                |
| RF power (W)                                   | 1400 W - 1550W (tuned daily)                                                          |
| Make-up gas flow ( $\text{l min}^{-1}$ )       | 0.90 - 0.99 $\text{l min}^{-1}$ Ar (tuned daily)                                      |

|                                                    |                                                                                                                                                                   |
|----------------------------------------------------|-------------------------------------------------------------------------------------------------------------------------------------------------------------------|
| Detection system                                   | triple (pulse counting, analog, Faraday)<br>cross calibrated daily                                                                                                |
| Masses measured (amu)                              | 202, 204, 206, 207, 208, 232, 235, 238                                                                                                                            |
| Integration time per peak/dwell times (ms)         | 10 ms (202, 208, 232, 235, 238), 20 ms (204), 90 ms (206), 75ms (207)                                                                                             |
| Total integration time per output data point (s)   | 0.243 s                                                                                                                                                           |
| Dead time (ns)                                     | 8                                                                                                                                                                 |
| Typical oxide rate (ThO/Th)                        | 0.18%                                                                                                                                                             |
| Typical doubly charged rate ( $Ba^{++}/Ba^{+}$ )   | 3.50%                                                                                                                                                             |
| <b>Data Processing</b>                             |                                                                                                                                                                   |
| Gas blank                                          | 10 s                                                                                                                                                              |
| Calibration strategy                               | GJ-1 used as primary reference material, Plešovice, Temora and 91500 used as secondaries/validation                                                               |
| Reference Material info                            | GJ-1 (Jackson <i>et al.</i> 2004)<br>Plešovice (Slama <i>et al.</i> 2008)<br>Temora (Black <i>et al.</i> 2003)<br>91500 (Wiedenbeck <i>et al.</i> 1995)           |
| Data processing package used / Correction for LIEF | Iolite 2.5, VizualAge for uncertainty propagation and age calculation. LIEF correction assumes reference material and samples behave identically.                 |
| Mass discrimination                                | normalised to reference material                                                                                                                                  |
| Common-Pb correction, composition and uncertainty  | No common-Pb correction applied to the data.                                                                                                                      |
| Uncertainty level and propagation                  | Ages are quoted at 2s absolute, propagation is by quadratic addition. Reproducibility and age uncertainty of reference material are propagated where appropriate. |

|                                 |                                                                                                                                                                   |
|---------------------------------|-------------------------------------------------------------------------------------------------------------------------------------------------------------------|
| Quality control /<br>Validation | Plešovice – Wtd ave $^{206}\text{Pb}/^{238}\text{U}$ age = $336 \pm 3.4$ (2s, MSWD = 1.5, n = 39) (0.15% Wtd ave uncert. (internal), 1.0% Total external uncert.) |
|                                 | Temora - Wtd ave $^{206}\text{Pb}/^{238}\text{U}$ age = $415 \pm 4$ (2s, MSWD = 1.6, n = 39) (0.18% Wtd ave uncert. (internal), 1.0% total external uncert.)      |
|                                 | 91500 – Wtd ave $^{206}\text{Pb}/^{238}\text{U}$ age = $1063 \pm 11$ (2s, MSWD = 0.61, n = 38) (0.15% Wtd ave uncert. (internal), 1.0% Total external uncert.)    |
|                                 | Systematic uncertainty for propagation is 1.0% (2s).                                                                                                              |

This reporting is based on a template available for download on [www.Plasmage.org](http://www.Plasmage.org)

Table DR3  
LA-ICP-MS data

Table DR4  
La Gloria zircon ID-TIMS data

| Composition |            |               |               | Isotopic Ratios |                   |                  |       |                  |       |                   |       | Dates (Ma)     |                  |            |                          |            |                  |            |
|-------------|------------|---------------|---------------|-----------------|-------------------|------------------|-------|------------------|-------|-------------------|-------|----------------|------------------|------------|--------------------------|------------|------------------|------------|
| Fraction    | Th/<br>U a | Pb*<br>(pg) b | Pbc<br>(pg) c | Pb*/<br>Pbc d   | 206Pb/<br>204Pb e | 206Pb/<br>238U f | ±2σ % | 207Pb/<br>235U f | ±2σ % | 207Pb/<br>206Pb f | ±2σ % | Corr.<br>coef. | 206Pb/<br>238U g | ±2σ<br>abs | 206Pb/<br>238U<br><Th> h | ±2σ<br>abs | 207Pb/<br>235U g | ±2σ<br>abs |
| LG1701      |            |               |               |                 |                   |                  |       |                  |       |                   |       |                |                  |            |                          |            |                  |            |
| LG1701_z1   | 0.92       | 1.35          | 0.16          | 8               | 472               | 0.0015774        | 0.162 | 0.010401         | 2.37  | 0.04784           | 2.26  | 0.686          | 10.161           | 0.016      | 10.246                   | 0.019      | 10.51            | 0.25       |
| LG1701_z2   | 0.71       | 1.63          | 0.17          | 9               | 546               | 0.0015736        | 0.146 | 0.010164         | 2.08  | 0.04687           | 1.98  | 0.718          | 10.136           | 0.015      | 10.221                   | 0.018      | 10.27            | 0.21       |
| LG1701_z3   | 1.13       | 1.25          | 0.07          | 19              | 987               | 0.0015809        | 0.101 | 0.010127         | 1.38  | 0.04648           | 1.30  | 0.740          | 10.183           | 0.010      | 10.268                   | 0.015      | 10.23            | 0.14       |
| LG1701_z4   | 1.17       | 1.98          | 0.06          | 32              | 1627              | 0.0015797        | 0.140 | 0.010129         | 1.51  | 0.04653           | 1.39  | 0.898          | 10.175           | 0.014      | 10.260                   | 0.018      | 10.23            | 0.15       |
| LG1701_z5   | 0.84       | 0.93          | 0.05          | 17              | 956               | 0.0015776        | 0.229 | 0.010426         | 2.77  | 0.04795           | 2.56  | 0.913          | 10.162           | 0.023      | 10.247                   | 0.025      | 10.53            | 0.29       |
| LG3701      |            |               |               |                 |                   |                  |       |                  |       |                   |       |                |                  |            |                          |            |                  |            |
| LG3701_z1   | 0.51       | 6.79          | 0.16          | 41              | 2472              | 0.0016065        | 0.060 | 0.010809         | 0.46  | 0.04882           | 0.41  | 0.725          | 10.3478          | 0.0062     | 10.433                   | 0.012      | 10.917           | 0.050      |
| LG3701_z2   | 0.37       | 8.87          | 0.43          | 21              | 1281              | 0.0016153        | 0.063 | 0.010724         | 0.71  | 0.04817           | 0.69  | 0.479          | 10.4046          | 0.0066     | 10.490                   | 0.012      | 10.831           | 0.077      |
| LG3701_z3   | 0.40       | 8.06          | 0.11          | 72              | 4418              | 0.0016140        | 0.048 | 0.010627         | 0.38  | 0.04777           | 0.35  | 0.498          | 10.3964          | 0.0050     | 10.482                   | 0.012      | 10.733           | 0.040      |
| LG3701_z4   | 0.69       | 1.45          | 0.09          | 16              | 909               | 0.0016200        | 0.101 | 0.010645         | 1.34  | 0.04768           | 1.28  | 0.658          | 10.435           | 0.011      | 10.520                   | 0.015      | 10.75            | 0.14       |
| LG3701_z5   | 0.58       | 1.99          | 0.10          | 20              | 1194              | 0.0016248        | 0.077 | 0.010423         | 1.00  | 0.04655           | 0.95  | 0.676          | 10.4655          | 0.0081     | 10.551                   | 0.013      | 10.53            | 0.10       |
| LG0302      |            |               |               |                 |                   |                  |       |                  |       |                   |       |                |                  |            |                          |            |                  |            |
| LG0302_z1   | 0.57       | 13.51         | 0.07          | 193             | 9782              | 0.0016608        | 0.186 | 0.010790         | 0.38  | 0.04714           | 0.31  | 0.607          | 10.697           | 0.020      | 10.782                   | 0.023      | 10.897           | 0.041      |
| LG0302_z2   | 0.53       | 25.90         | 0.21          | 126             | 7431              | 0.0016596        | 0.088 | 0.010802         | 0.23  | 0.04723           | 0.19  | 0.617          | 10.6899          | 0.0094     | 10.775                   | 0.014      | 10.909           | 0.025      |
| LG0302_z3   | 0.46       | 15.61         | 0.18          | 87              | 5225              | 0.0016320        | 0.074 | 0.010602         | 0.24  | 0.04714           | 0.20  | 0.577          | 10.5119          | 0.0078     | 10.597                   | 0.013      | 10.708           | 0.026      |
| LG0302_z4   | 0.71       | 30.77         | 0.43          | 72              | 4057              | 0.0016627        | 0.079 | 0.010827         | 0.25  | 0.04725           | 0.22  | 0.490          | 10.7093          | 0.0085     | 10.794                   | 0.014      | 10.935           | 0.027      |
| LG0302_z5   | 0.59       | 15.63         | 0.51          | 31              | 1802              | 0.0016579        | 0.116 | 0.010829         | 0.54  | 0.04739           | 0.50  | 0.391          | 10.679           | 0.012      | 10.764                   | 0.016      | 10.937           | 0.059      |
| LG0302_z6   | 0.58       | 8.17          | 0.35          | 23              | 1181              | 0.0016511        | 0.187 | 0.010768         | 2.43  | 0.04732           | 2.31  | 0.700          | 10.635           | 0.020      | 10.720                   | 0.022      | 10.88            | 0.26       |
| LG0103      |            |               |               |                 |                   |                  |       |                  |       |                   |       |                |                  |            |                          |            |                  |            |
| LG0103_z1   | 0.86       | 3.02          | 0.15          | 20              | 1079              | 0.0017302        | 0.093 | 0.011089         | 1.09  | 0.04651           | 1.02  | 0.716          | 11.144           | 0.010      | 11.229                   | 0.015      | 11.20            | 0.12       |
| LG0103_z2   | 1.01       | 1.41          | 0.11          | 12              | 666               | 0.0017304        | 0.137 | 0.011041         | 1.79  | 0.04630           | 1.68  | 0.784          | 11.145           | 0.015      | 11.230                   | 0.018      | 11.15            | 0.20       |
| LG0103_z3   | 0.79       | 3.46          | 0.12          | 29              | 1639              | 0.0017315        | 0.080 | 0.011220         | 0.80  | 0.04701           | 0.74  | 0.748          | 11.1526          | 0.0089     | 11.238                   | 0.014      | 11.329           | 0.090      |
| LG0103_z4   | 0.83       | 2.07          | 0.11          | 19              | 1082              | 0.0017363        | 0.127 | 0.011486         | 2.13  | 0.04800           | 2.05  | 0.638          | 11.183           | 0.014      | 11.268                   | 0.018      | 11.60            | 0.25       |
| LG0103_z5   | 1.02       | 2.91          | 0.10          | 30              | 1602              | 0.0017336        | 0.086 | 0.011048         | 0.93  | 0.04624           | 0.87  | 0.804          | 11.1660          | 0.0095     | 11.251                   | 0.014      | 11.16            | 0.10       |

a Th contents calculated from radiogenic 208Pb and 230Th-corrected 206Pb/238U date of the sample, assuming concordance between U-Pb Th-Pb systems.  
b Total mass of radiogenic Pb.  
c Total mass of common Pb.  
d Ratio of radiogenic Pb (including 208Pb) to common Pb.  
e Measured ratio corrected for fractionation and spike contribution only.  
f Measured ratios corrected for fractionation, tracer and blank. The blank composition used was an average of 14 total procedural blank measurements performed over the course of this study: 206Pb/204Pb = 18.41 ± 0.39, 207Pb/204Pb = 15.19 ± 0.39, 208Pb/204Pb = 36.93 ± 0.91 (2σ)  
g Isotopic dates calculated using λ238 = 1.55125E-10 (Jaffey et al. 1971) and λ235 = 9.8485E-10 (Jaffey et al. 1971).  
h Corrected for initial Th/U disequilibrium using a fixed partition coefficient ratio DTh/DU=0.218 ± 0.097 (2σ) (Szymanowski et al. 2017).
